# Supplementary figures and images for: Differential expression of IFN-α, IL-12 and BAFF on renal immune cells and its relevance to disease activity and treatment responsiveness in patients with proliferative lupus nephritis
Source: HighWire-hosted journal article supplement (doi:10.1136/lupus-2023-000962), 2023-07-01

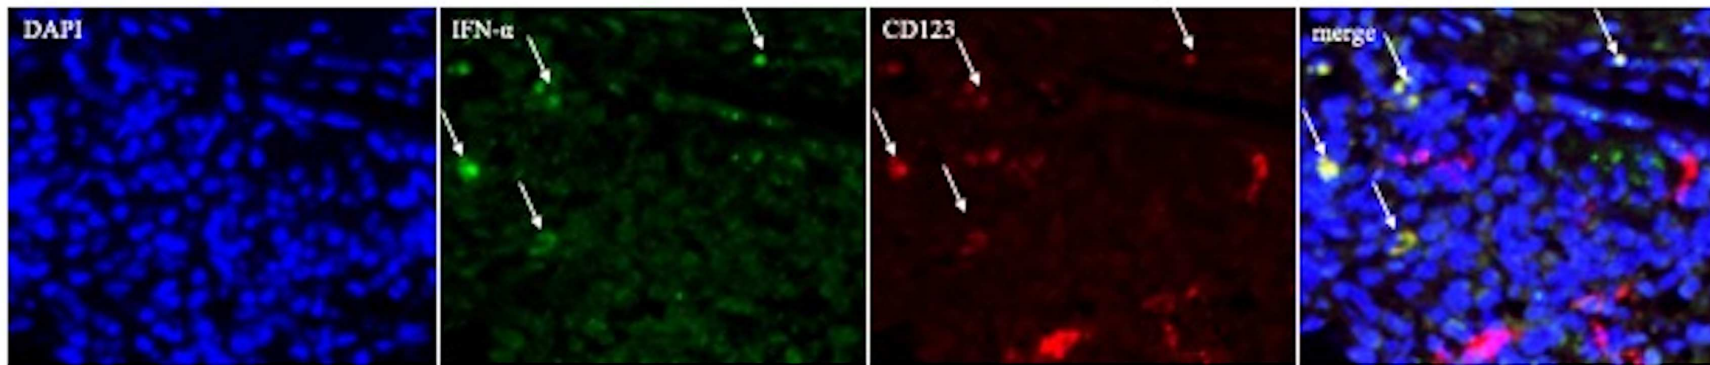

Supplement Figure 1:Immunofluorescent study of IFN- $\alpha$  and CD123

Supplement: lupus-2023-000962supp001_data_supplement.pdf [file lupus-2023-000962supp001_data_supplement.pdf]
